# Supplementary material for: Development of commutable candidate certified reference materials from protein solutions: concept and application to human insulin
Source: publisher site journal article supplement (doi:10.1515/cclm-2025-0329), 2025-04-24
Supplement: Supplementary file 1 [file j_cclm-2025-0329_suppl_001.pdf]

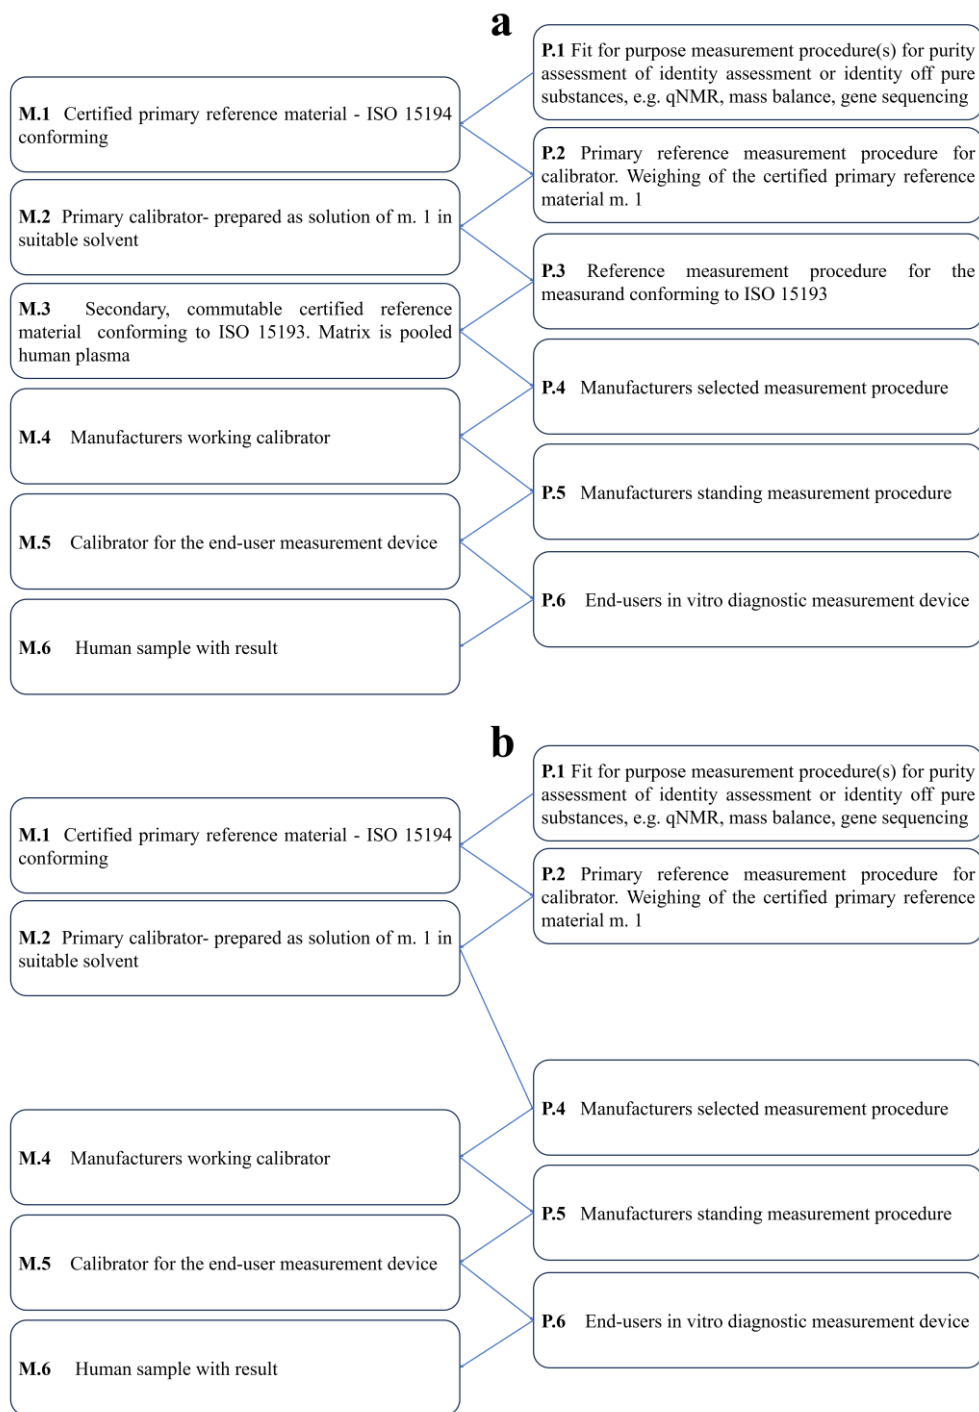

**Figure S1: Measurement hierarchy fully traceable to SI units**

(a) Illustration in ISO 17511:2020 with commutable RM of m3

(b) Measurement hierarchy with commutable RM of m2

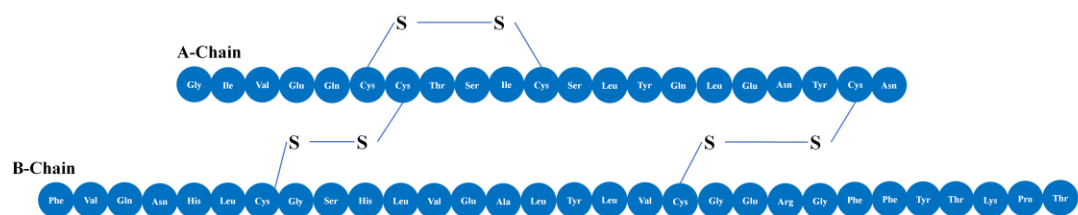

**Figure S2:** Schematic illustration of human insulin structure

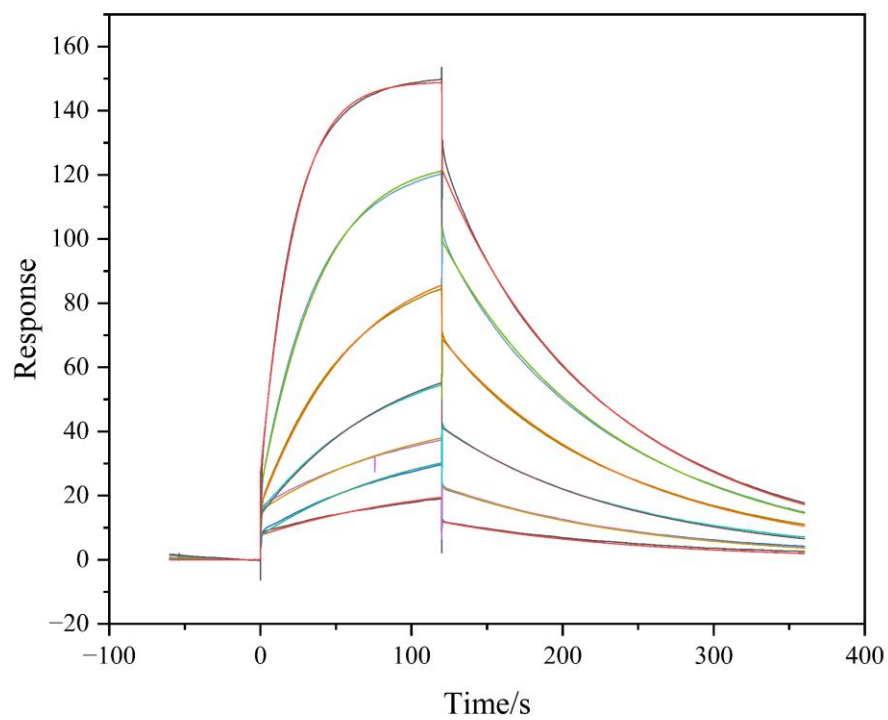

**Figure S3:** Determination of the kinetic constants between insulin and mAbs

Table S1. Uncertainty component from value assignment

| Level | Pipettor | Balance | GBW09292 | volumetric flask | LOD   | Homogeneity | Stability | $u_c$ | $U$  |
|-------|----------|---------|----------|------------------|-------|-------------|-----------|-------|------|
| 1     | 0.31%    | 0.21%   | 1.40%    | 0.51%            | 0.01% | 1.01%       | 1.21%     | 2.20% | 4.4% |
| 2     | 0.25%    | 0.21%   | 1.40%    | 0.51%            | 0.02% | 1.24%       | 1.50%     | 2.47% | 5.0% |
| 3     | 0.25%    | 0.21%   | 1.40%    | 0.51%            | 0.02% | 0.92%       | 0.87%     | 1.98% | 4.0% |
| 4     | 0.39%    | 0.21%   | 1.40%    | 0.51%            | 0.03% | 0.79%       | 0.77%     | 1.91% | 3.8% |
| 5     | 0.18%    | 0.21%   | 1.40%    | 0.51%            | 0.06% | 0.98%       | 1.33%     | 2.24% | 4.5% |
| 6     | 0.35%    | 0.21%   | 1.40%    | 0.51%            | 0.17% | 0.72%       | 0.97%     | 1.97% | 4.0% |
